# Supplementary material for: Innovative Hybrid-Alignment Annotation Method for Bioinformatics Identification and Functional Verification of a Novel Nitric Oxide Synthase in Trichomonas vaginalis
Source: MDPI journal article supplement (doi:10.3390/biology11081210), 2022-08-12
Supplement: s1 [file s1]

### Supplementary information

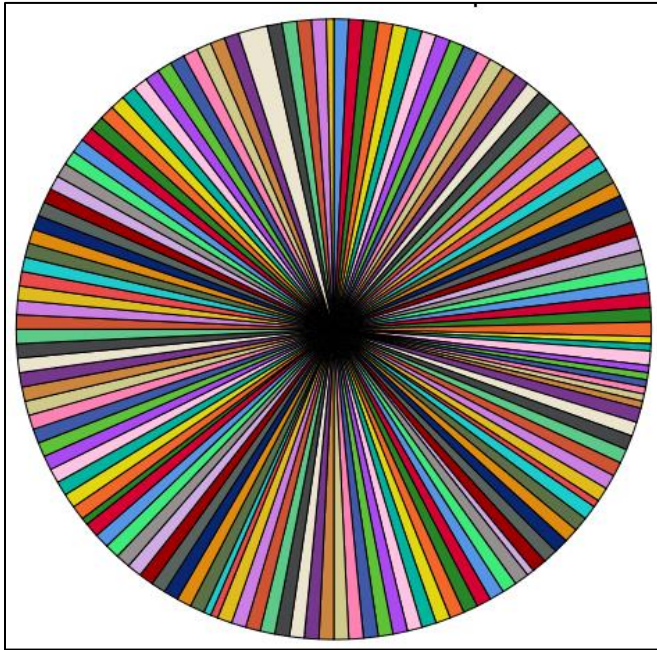

**Supplementary Figure S1a.** NOS-A total of 273 identifications of the non-TV NOS protein sequences for searching candidate proteins.

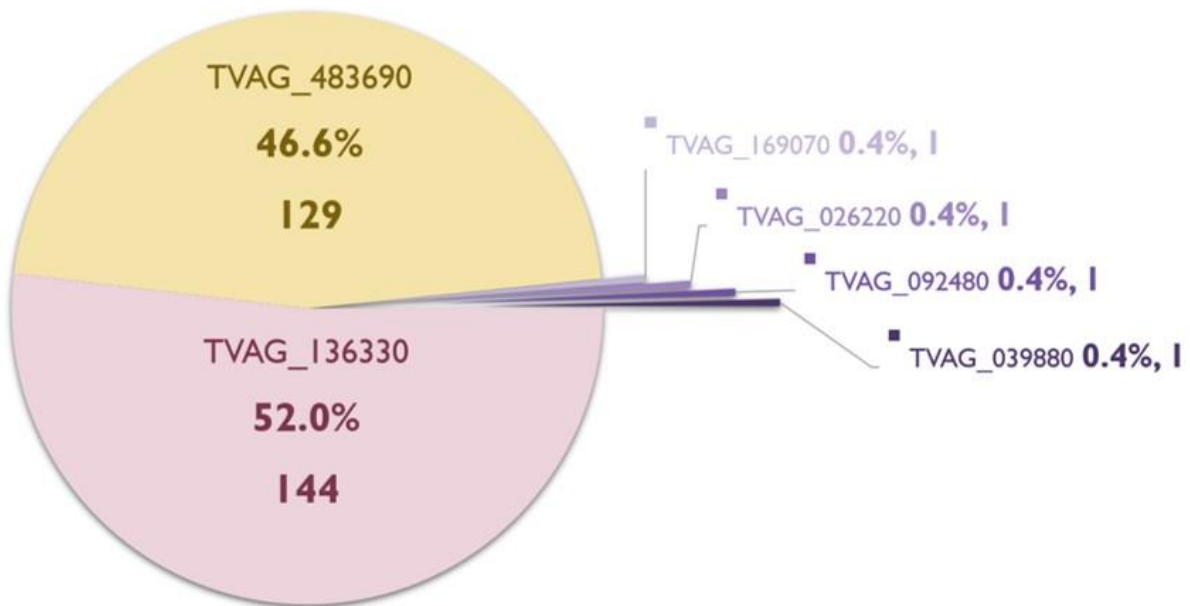

**Supplementary Figure S1b** *T. vaginalis*- a total of 6 sequences of the *T. vaginalis* sequence recognized as candidates of NOS.

## MATLAB Syntax

- Identify repetitive sequences

```
j=fastaread('Folder Path\TV120958.fasta') %read file
```

```
T1=struct2table(j(1:60000)) %T1- Convert the 1st - 60,000th data to table
```

```
T1.Properties.RowNames=T1.Header %Convert the T1 variable Header to rowname
```

```
T1.Header=[]
```

```
T2=struct2table(j(60001:120958)) %T2- Convert the 60001th -120958th data to table
```

```
T2.Properties.RowNames=T2.Header %Convert the T2 variable Header to rowname
```

```
T2.Header=[]
```

```
T=[T1;T2] %T=combine T1&T2
```

```
uT=unique(T) %Identify repetitive sequences
```

```
S = table2struct(uT,'ToScalar',true) %Convert table to struct format
```

```
S.Header = uT.Properties.RowNames %Convert rowname to variable
```

```
combineS=[S.Header,S.Sequence] %% Merge the field
```

```
colHeadings = {'Header','Sequence'} % Define the name of the field
```

```
jj=cell2struct(combineS, colHeadings, 2)
```

```
fastawrite('Folder Path\TV50769.fasta',jj) %%Export FASTA
```

- Local alignment: Smith-Waterman alignment

```
NOS=fastaread('Folder Path\NOS141074.fasta') % Protein sequences

TV=fastaread('Folder Path\TV120958.fasta') % Species Sequence

for i=1:14107    %Protein sequence count, data splitting calculation
    for j=1:120958 %whole sequences of TV
        try      % When an error sequence is encountered, jump down automatically
            [Localscore a]=swalign(NOS(i).Sequence,TV(j).Sequence) %local alignment
        if Localscore >100    %Those who save more than 100 points
            a = [i j Localscore]
            save 'Folder Path\NOS14107_TV120958.txt' a -ascii -append
        end
    end
end
end
end
```

- Global alignment: Needleman–Wunsch alignment

```
for i=[9555 10451 13258 13601 13628 23503] %Filtered sequence number
    for j=[9555 10451 13258 13601 13628 23503]
        [s align]=nwalign(TV(i).Sequence,TV(j).Sequence) %global alignment
        a=[i j s]
    save 'Folder Path\TV_NW.txt' a -ascii -append
    end
end
```

- Phylogenic tree

```
NOS=fastaread('C:\Users\b_soph\Downloads\HungChe\NOS14107_uni3639_plusTV1_2.fasta')
```

```
a=[NOS(13) NOS(108) NOS(109) NOS(373) NOS(374) NOS(375) NOS(717) NOS(1951) NOS(1952)
NOS(1953) NOS(1954) NOS(1955) NOS(1957) NOS(1958) NOS(2023) NOS(2112) NOS(2294) NOS(2295)
NOS(2342) NOS(2343) NOS(2379) NOS(2406) NOS(2407) NOS(2461) NOS(2507) NOS(2508) NOS(2509)
NOS(2510) NOS(2610) NOS(2957) NOS(2960) NOS(3482) NOS(3640) NOS(3641)]
```

```
tree = seqlinkage(seqpdist(a),'single', a)
```

```
view(tree)
```

## Autodock FR simulation

We selected known identified NOS structures to simulate heme binding *Mus musculus*

(Protein name on Protein Data Bank (PDB): 3DWJ)

## The first group of models

| mode | Affinity<br>(kcal/mol) | clust.<br>rmsd | ref.<br>rmsd | clust.<br>size | Rmsd<br>stdv | Energy<br>stdv | Best<br>Run |
|------|------------------------|----------------|--------------|----------------|--------------|----------------|-------------|
| 1    | -10.0                  | 0              | -1.0         | 4              | 0.6          | 0.6            | 5           |
| 2    | -8.8                   | 7.8            | -1.0         | 3              | 0.5          | 0.2            | 9           |
| 3    | -8.1                   | 4.7            | -1.0         | 1              | NA           | NA             | 1           |
| 4    | -7.7                   | 5.9            | -1.0         | 2              | 0.7          | 0              | 10          |

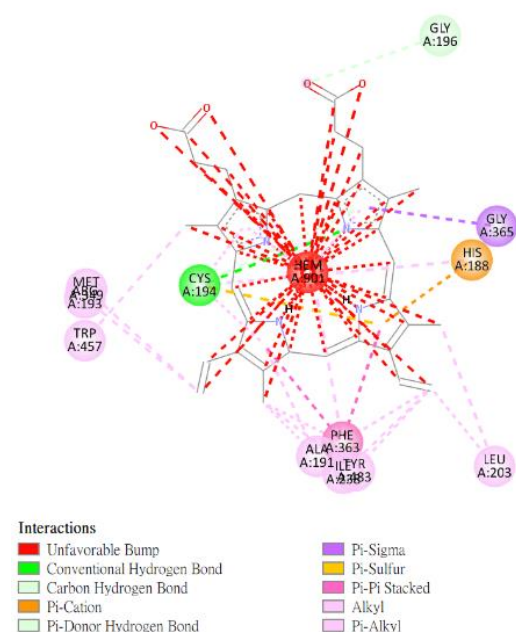

**Figure S2.** Ligand–receptor interaction results of *Mus musculus* protein (3DWJ) with Heme. Three-dimensional (3D) representation of 3DWJ in complex with Heme with the highest binding energy of  $-10.0$  kcal/mol. The accompanying table shows summary results of the analysis.

Schematic diagram of TV1 and TV2 protein simulation

**TV1**

**HEME**

### Group 1 Model

| mode | Affinity<br>(kcal/mol) | clust.<br>rmsd | ref.<br>rmsd | clust.<br>size | Rmsd<br>stdv | Energy<br>stdv | Best<br>run |
|------|------------------------|----------------|--------------|----------------|--------------|----------------|-------------|
| 1    | -7.8                   | 0.0            | -1.0         | 3              | 0.4          | 0.4            | 9           |
| 2    | -7.4                   | 12             | -1.0         | 3              | 0.4          | 0.9            | 6           |
| 3    | -6.6                   | 4.8            | -1.0         | 3              | 0.8          | 0.0            | 2           |
| 4    | -5.9                   | 5.5            | -1.0         | 1              | NA           | NA             | 8           |

Close to the predicted position of the 134th amino acid

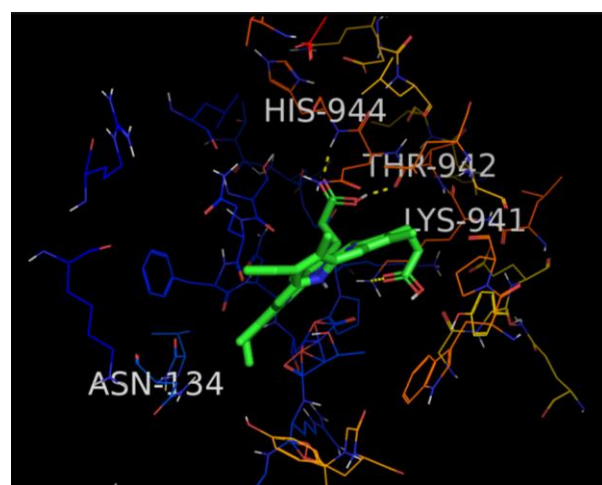

(a)

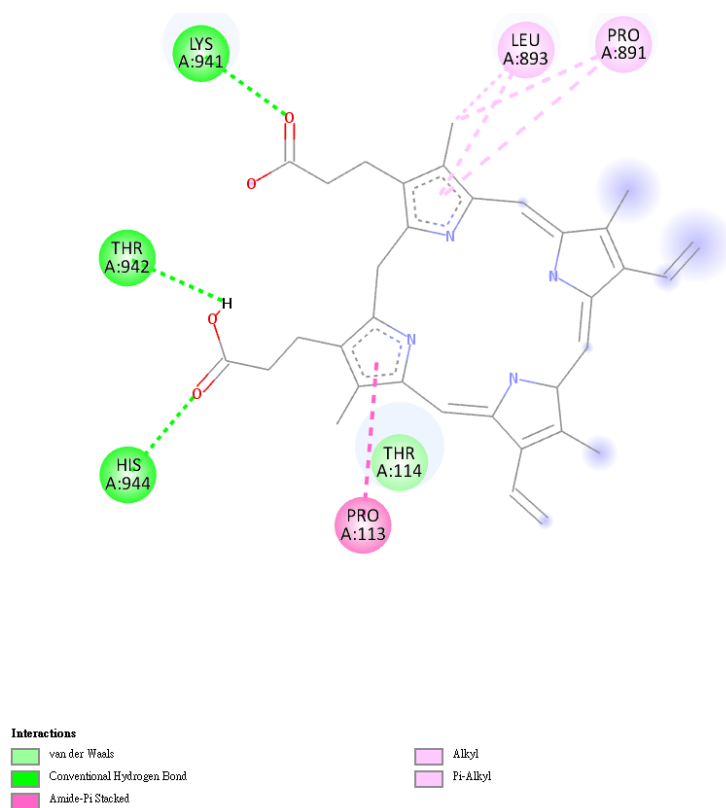

(b)

Hydrogen bond location:

| Amino acid | Amino acid position in sequence |
|------------|---------------------------------|
| LYS        | 941                             |
| THR        | 942                             |
| HIS        | 944                             |

**Figure S3.** Protein-cofactor interaction results of TV1 with Heme. (a) Three-dimensional (3D) representation of TV1 in complex with Heme with the highest binding energy of – 7.8 kcal/mol.

(b) Two-dimensional (2D) representation of TV1 in complex with Heme, showing interactions with three conventional H-bonds, with interactions further stabilized by

different amino acids around the TV1 backbone. The accompanying table shows summary results of the analysis.

**TV1**

**BH4**

### Group 3 Model

| mode | Affinity<br>(kcal/mol) | clust.<br>rmsd | ref.<br>rmsd | clust.<br>size | Rmsd<br>stdv | Energy<br>stdv | Best<br>run |
|------|------------------------|----------------|--------------|----------------|--------------|----------------|-------------|
| 1    | -7.2                   | 0.0            | -1.0         | 8              | 0.7          | 0.2            | 10          |
| 2    | -7.0                   | 2.7            | -1.0         | 1              | NA           | NA             | 8           |
| 3    | -6.5                   | 2.1            | -1.0         | 1              | NA           | NA             | 7           |

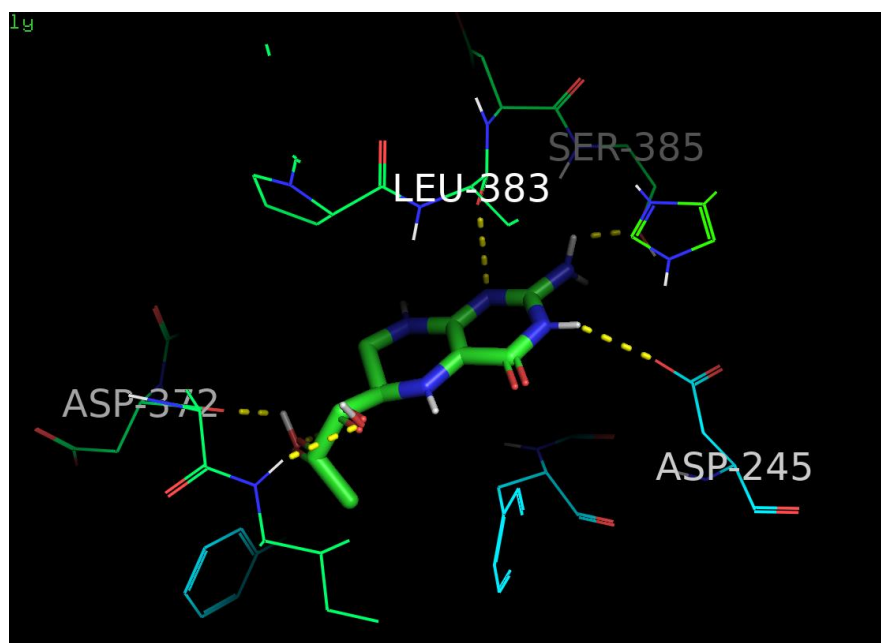

(a)

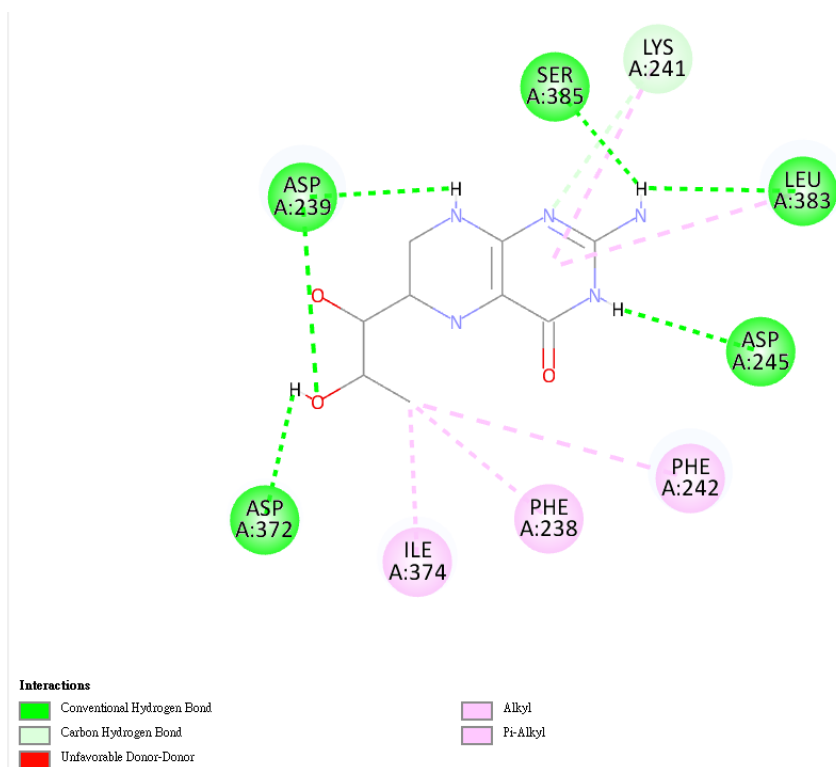

(b)

Hydrogen bond location:

| Amino acid | Amino acid position in sequence |
|------------|---------------------------------|
| ASP        | 239                             |
| ASP        | 245                             |
| ASP        | 372                             |
| ILE        | 374                             |
| LEU        | 383                             |
| SER        | 385                             |

**Figure S4.** Protein-cofactor interaction results of TV1 with BH4. (a) Three-dimensional (3D) representation of TV1 in complex with Heme with the highest binding energy of – 7.2 kcal/mol.



(b) Two-dimensional (2D) representation of TV1 in complex with BH4, showing interactions with three conventional H-bonds, with interactions further stabilized by different amino acids around the TV1 backbone. The accompanying table shows summary results of the analysis.

TV1

FMN

Group XI Model

| mode | Affinity<br>(kcal/mol) | clust.<br>rmsd | ref.<br>rmsd | clust.<br>size | Rmsd<br>stdv | Energy<br>stdv | Best<br>run |
|------|------------------------|----------------|--------------|----------------|--------------|----------------|-------------|
| 1    | -6.5                   | 0              | -1.0         | 1              | NA           | NA             | 4           |
| 2    | -6.3                   | 5.5            | -1.0         | 2              | 0.3          | 0              | 2           |
| 3    | -5.6                   | 5.3            | -1.0         | 3              | 0.8          | 0              | 5           |
| 4    | -5.6                   | 3.4            | -1.0         | 1              | NA           | NA             | 1           |
| 5    | -5.3                   | 5.2            | -1.0         | 1              | NA           | NA             | 8           |
| 6    | -4.9                   | 3.6            | -1.0         | 1              | NA           | 0.0            | 7           |
| 7    | -3.7                   | 4.6            | -1.0         | 1              | NA           | NA             | 3           |

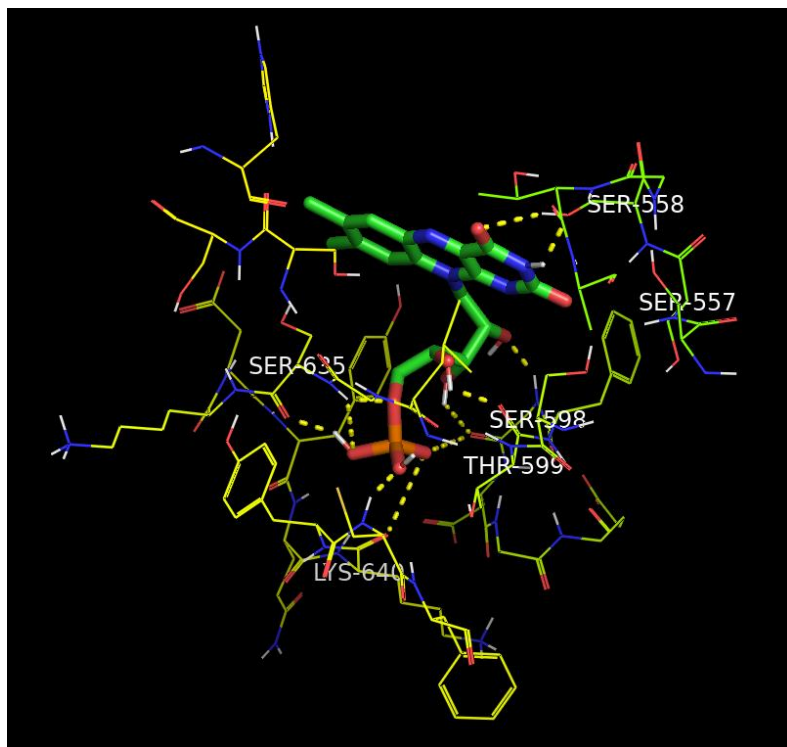

(a)

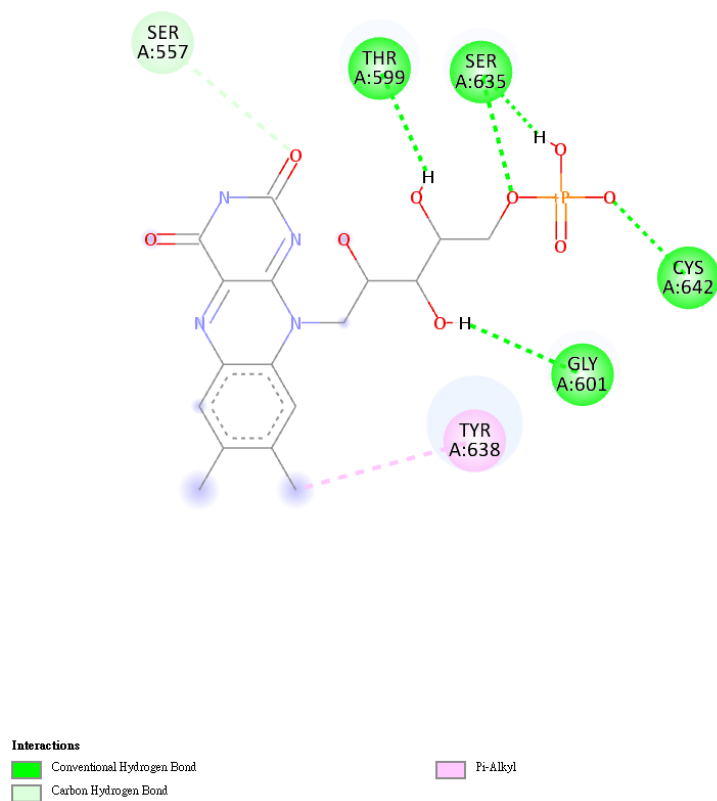

(b)

Hydrogen bond location:

| Amino acid | Amino acid position in sequence |
|------------|---------------------------------|
| SER        | 557                             |
| THR        | 599                             |
| GLY        | 601                             |
| SER        | 635                             |
| TYR        | 638                             |
| CYS        | 642                             |

**Figure S5.** Protein-cofactor interaction results of TV1 with FMN. (a) Three-dimensional (3D) representation of TV1 in complex with Heme with the highest binding energy of – 6.5 kcal/mol.

(b) Two-dimensional (2D) representation of TV1 in complex with FMN, showing interactions with four conventional H-bonds, with interactions further stabilized by different amino acids around the TV1 backbone. The accompanying table shows summary results of the analysis.

TV1

FAD

Group I Model

| mode | Affinity (kcal/mol) | clust. rmsd | ref. rmsd | clust. size | Rmsd stdv | Energy stdv | Best run |
|------|---------------------|-------------|-----------|-------------|-----------|-------------|----------|
| 1    | -10.6               | 0.0         | -1.0      | 1           | NA        | NA          | 1        |
| 2    | -9.3                | 6.1         | -1.0      | 1           | NA        | NA          | 9        |
| 3    | -9.2                | 4.4         | -1.0      | 1           | NA        | NA          | 8        |
| 4    | -8.4                | 4.4         | -1.0      | 1           | NA        | NA          | 5        |
| 5    | -8.3                | 3.2         | -1.0      | 1           | NA        | NA          | 4        |

|   |      |     |      |   |     |     |    |
|---|------|-----|------|---|-----|-----|----|
| 6 | -6.8 | 9.5 | -1.0 | 2 | 0.7 | 0.0 | 2  |
| 7 | -6.6 | 5.9 | -1.0 | 1 | NA  | NA  | 7  |
| 8 | -4.9 | 9.9 | -1.0 | 1 | NA  | NA  | 10 |
| 9 | -3.5 | 9.9 | -1.0 | 1 | NA  | NA  | 3  |

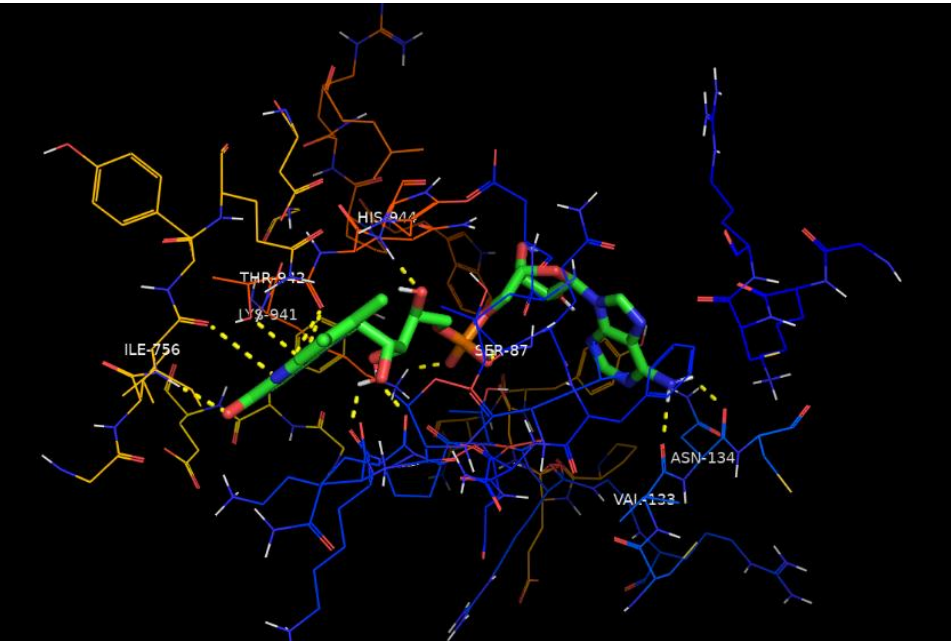

(a)

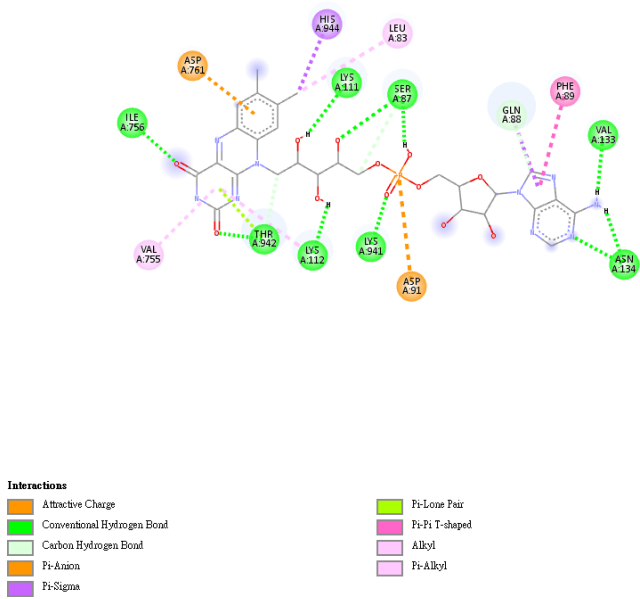

(b)

Hydrogen bond location:

| Amino acid | Amino acid position in sequence |
|------------|---------------------------------|
| SER        | 87                              |
| VAL        | 133                             |
| ASN        | 134                             |
| ILE        | 756                             |
| LYS        | 941                             |
| THR        | 943                             |
| HIS        | 944                             |

**Figure S6.** Protein-cofactor interaction results of TV1 with FAD. (a) Three-dimensional (3D) representation of TV1 in complex with FAD with the highest binding energy of – 7.7 kcal/mol.

(b) Two-dimensional (2D) representation of TV1 in complex with FAD, showing interactions with ten conventional H-bonds, with interactions further stabilized by different amino acids around the TV1 backbone. The accompanying table shows summary results of the analysis.

TV1

NADP

Group V Model

| mode | Affinity (kcal/mol) | clust. rmsd | ref. rmsd | clust. size | Rmsd stdv | Energy stdv | Best run |
|------|---------------------|-------------|-----------|-------------|-----------|-------------|----------|
| 1    | -8.2                | 0.0         | -1.0      | 1           | NA        | NA          | 9        |
| 2    | -6.4                | 7.7         | -1.0      | 1           | NA        | NA          | 1        |
| 3    | -5.8                | 7.6         | -1.0      | 1           | NA        | NA          | 6        |
| 4    | -5.0                | 7.0         | -1.0      | 1           | NA        | NA          | 7        |

|    |      |      |      |   |    |    |    |
|----|------|------|------|---|----|----|----|
| 5  | -5.0 | 8.6  | -1.0 | 1 | NA | NA | 4  |
| 6  | -4.8 | 6.6  | -1.0 | 1 | NA | NA | 8  |
| 7  | -3.6 | 7.2  | -1.0 | 1 | NA | NA | 3  |
| 8  | -3.5 | 7.9  | -1.0 | 1 | NA | NA | 2  |
| 9  | -2.0 | 6.7  | -1.0 | 1 | NA | NA | 10 |
| 10 | 0    | 10.1 | -1.0 | 1 | NA | NA | 5  |

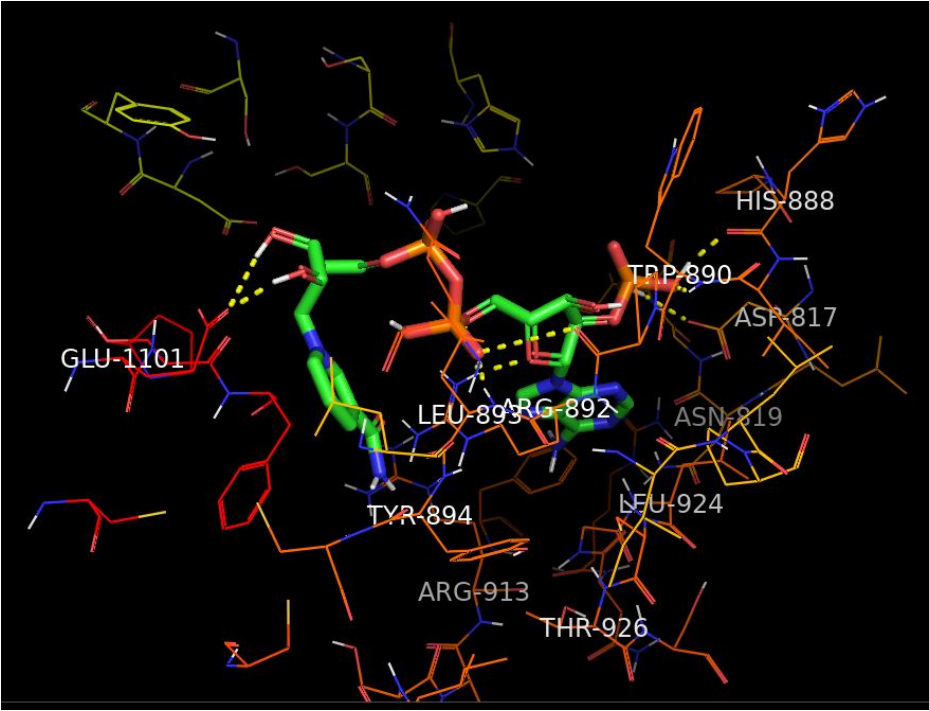

(a)

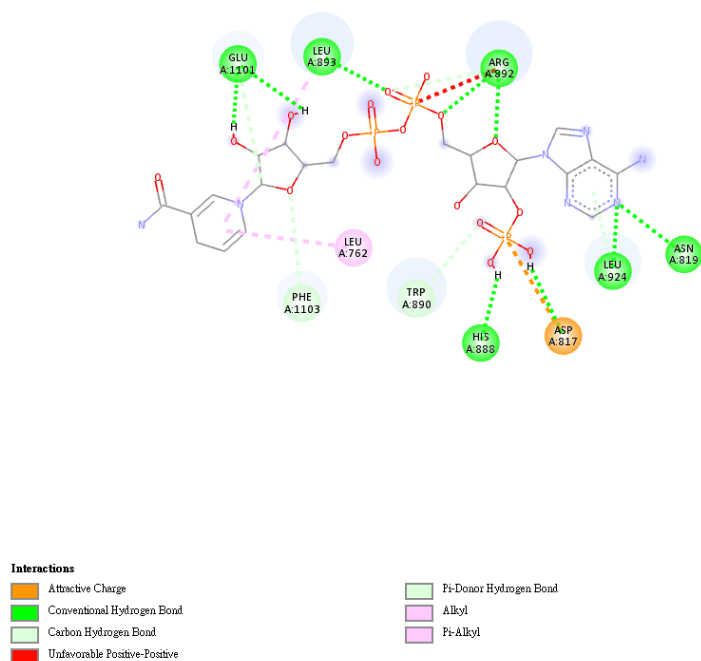

(b)

Hydrogen bond location:

| Amino acid | Amino acid position in sequence |
|------------|---------------------------------|
| ASP        | 817                             |
| ASN        | 819                             |
| HIS        | 888                             |
| ARP        | 890                             |
| ARG        | 892                             |
| LEU        | 893                             |
| LEU        | 924                             |
| GLU        | 1101                            |
| PHE        | 1103                            |

**Figure S7.** Protein-cofactor interaction results of TV1 with NADP. (a) Three-dimensional (3D) representation of TV1 in complex with NADP with the highest binding energy of  $-8.2$  kcal/mol.

(b) Two-dimensional (2D) representation of TV1 in complex with NADP, showing interactions with nine conventional H-bonds, with interactions further stabilized by different amino acids around the TV1 backbone. The accompanying table shows summary results of the analysis.

TV1

L-NMMA

Group 1 Model

| Mode | Affinity<br>(kcal/mol) | clust.<br>rmsd | ref.<br>rmsd | clust.<br>size | Rmsd<br>stdv | Energy<br>stdv | Best<br>run |
|------|------------------------|----------------|--------------|----------------|--------------|----------------|-------------|
| 1    | -5.6                   | 0              | -1.0         | 2              | 0.6          | 0              | 1           |
| 2    | -5.4                   | 6.1            | -1.0         | 2              | 0.3          | 0              | 10          |
| 3    | -5.4                   | 3.2            | -1.0         | 2              | 0.1          | 0              | 3           |
| 4    | -4.8                   | 6.5            | -1.0         | 2              | 0.3          | 0              | 8           |
|      | -4.5                   | 5.1            | -1.0         | 2              | 0.6          | 0              | 9           |



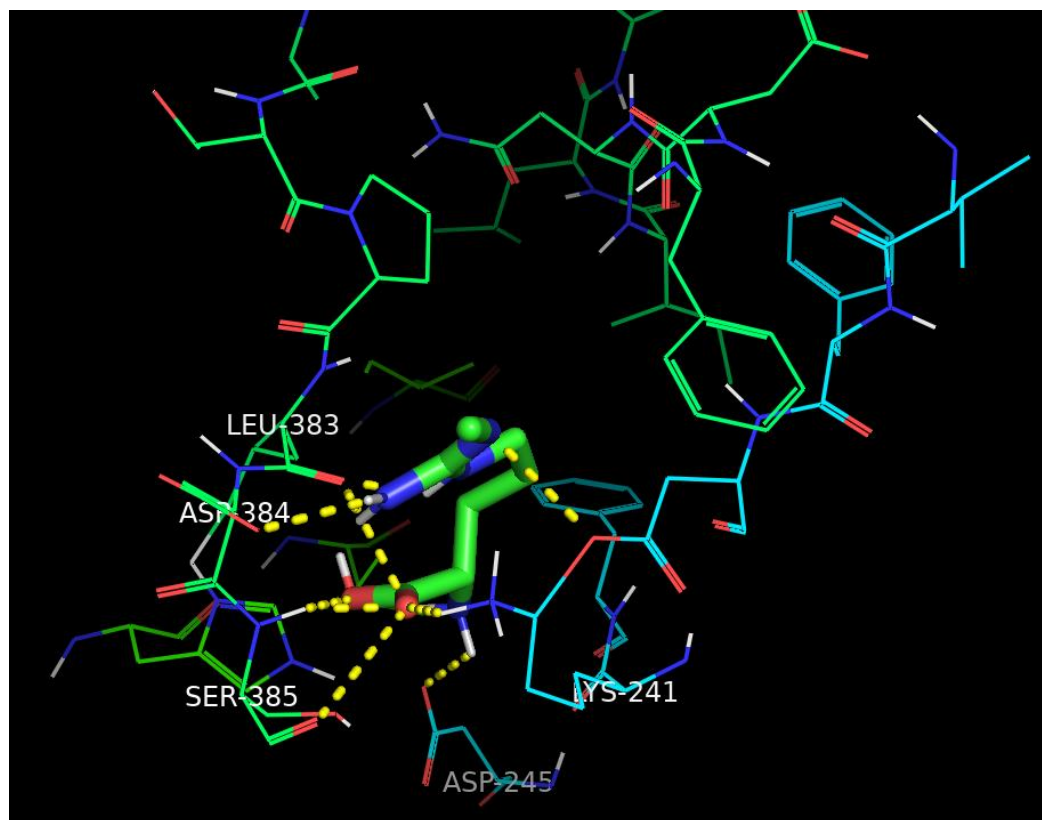

(a)

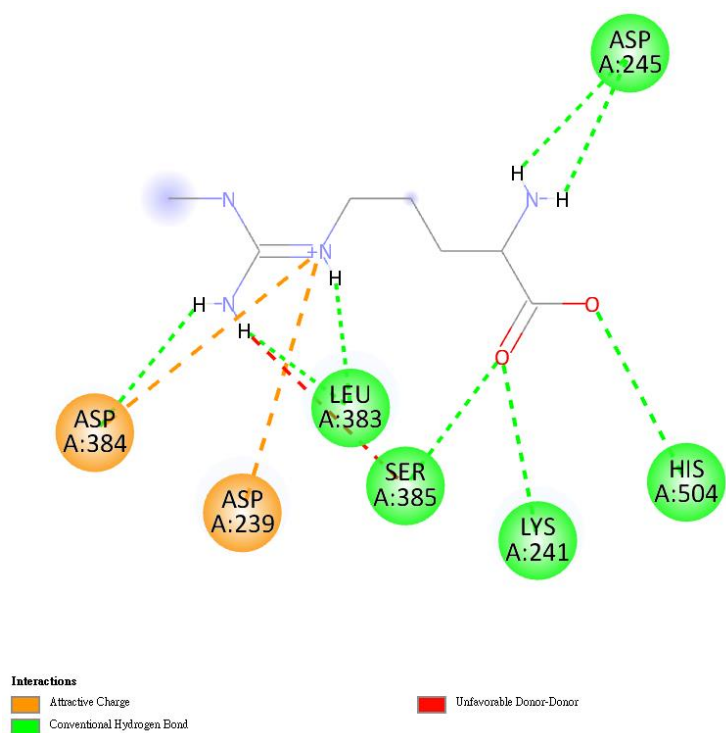

(b)

Hydrogen bond location:

| Amino acid | Amino acid position in sequence |
|------------|---------------------------------|
| LYS        | 241                             |
| ASP        | 245                             |
| LEU        | 383                             |
| ASP        | 384                             |
| SER        | 385                             |
| HIS        | 504                             |

**Figure S8.** Protein-cofactor interaction results of TV1 with NOS inhibitor(L-NMMA). (a)

Three-dimensional (3D) representation of TV1in complex with L-NMMA with the highest binding energy of – 5.6 kcal/mol. (b) Two-dimensional (2D) representation of TV1 in complex with L-NMMA, showing interactions with seven conventional H-bonds, with interactions further stabilized by different amino acids around the TV1 backbone. The accompanying table shows summary results of the analysis.

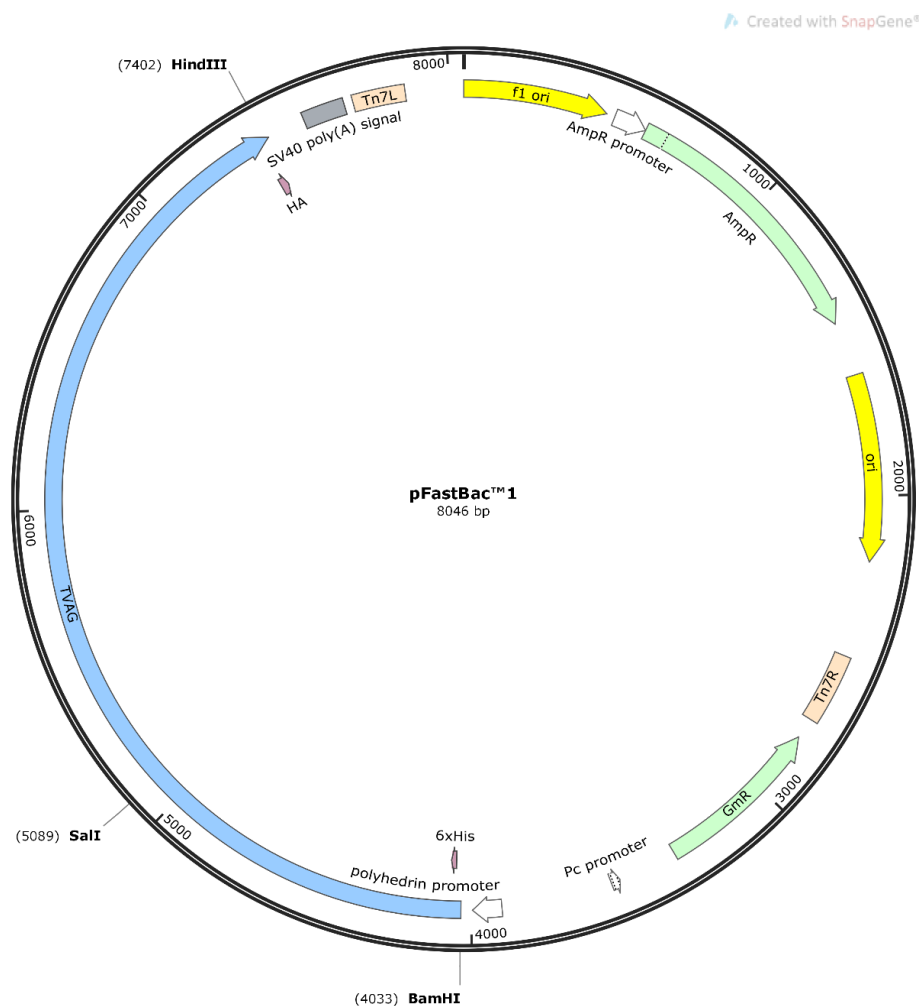

**Figure S9.** pFastBac1 Vector of TV1.

### Simulation of TV1 and TV2 reductase domains by Discovery Studio

The structural models of the TV1 and TV2 reductase domains were built using the homology modeling protocol in the Biovia Discovery Studio 2017 program. The resolved structures of NADPH-cytochrome P450 reductase from human, rat and *Saccharomyces cerevisiae* (PDB codes: 3qe2, 1jal and 2bpo, respectively) and the rat nNOS

FAD/NADP domain (PDB code: 1f20) were used as templates. The validity of the models was assessed using the Verify Protein protocol. The model with the best probability density function (PDF) energy and discrete optimized protein energy (DOPE) score was subjected to the CHARM force field for energy minimization.

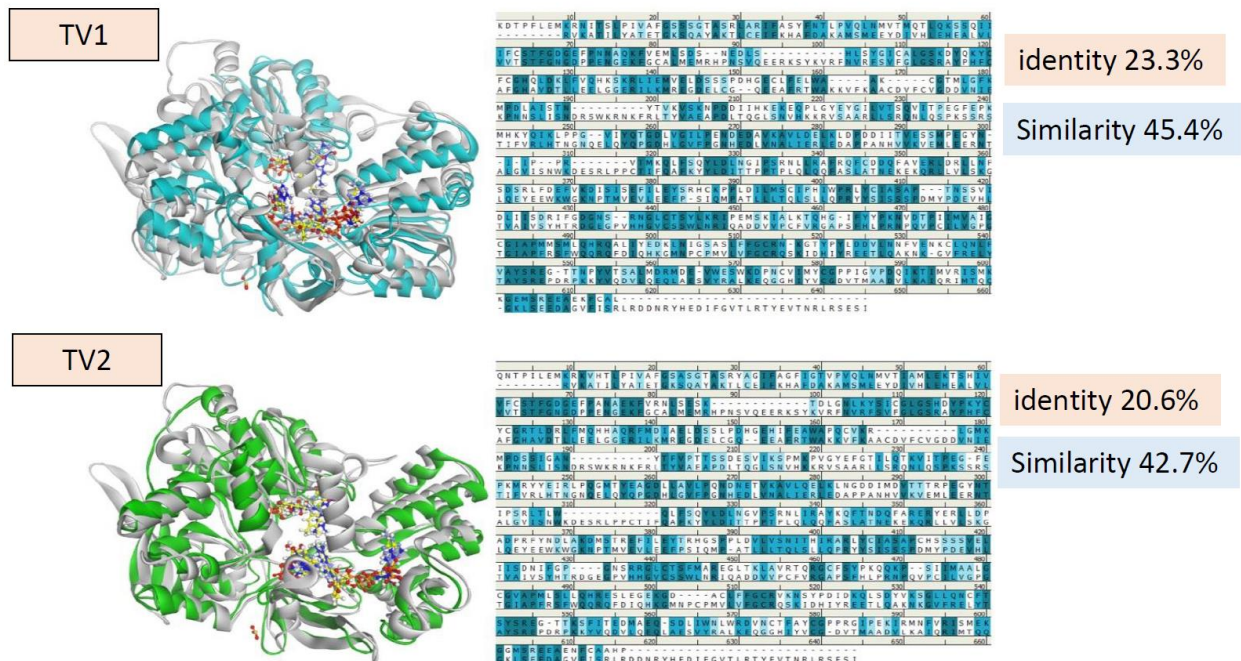

**Figure S10.** Simulated models of the TV1 and TV2 reductase domains by Discovery Studio

Alignment of sequence and structure models. Superposition of the models of the TV1 reductase domain (a) (cyan) and TV2 reductase domain (b) (green) with the structure of the rat nNOS reductase domain (PDB code: 1f20) (gray). The backbone root mean square deviation (RMSD) was 8.1 and 6.8 Å for the models of the TV1 and TV2 reductase domains, respectively.

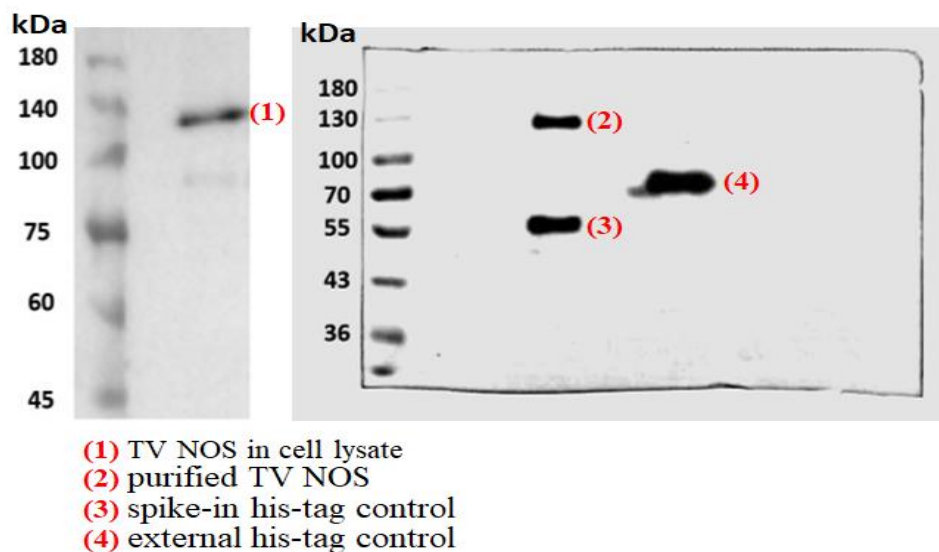

(a)

|                     | Densitometry readings |
|---------------------|-----------------------|
| Band (1)            | 13969                 |
| Band (2)            | 33547                 |
| Band (3)            | 37051                 |
| Band (4)            | 53124                 |
| Ratios of intensity |                       |
| Band (2) / Band (3) | 0.905                 |
| Band (2) / Band (4) | 0.631                 |

(b)

**Figure S11. (A)** Whole blot images showing TV NOS proteins and his-tag controls. A representative whole blot image of the lysate of SF9 insect cells stained with anti-his tag antibody is displayed, and TV NOS in cell lysate is indicated on the left panel. A representative whole blot image of purified TV NOS together with a spike-in his-tag

control and an external his-tag control loaded in a different lane is displayed on the right panel. **(B)** Densitometry readings of TV NOS in cell lysate and purified TV NOS from the whole blot images are shown. Ratios of purified TV NOS to spike-in his-tag control and external his-tag control are also displayed.

### **Supplementary materials and methods**

**LC-MS/MS analysis.** Fifty microgram TV NOS protein was dissolved in 6M urea, reduced with 5 mM dithiothreitol for 45 min at 29°C, alkylated with 10 mM iodoacetamide in the dark for 45 min at 29°C, and digested with 1 µg MS-grade Trypsin Gold (Promega, Madison, WI) at 29°C for 16 hr [1-5]. The reaction was terminated by add 10% trifluoroacetic acid (TFA) to a final concentration of 0.5% TFA, and tryptic peptide solution was desalted with C18 ZipTip prior to LC-MS/MS analysis. The eluted peptides were dissolved in 0.1% formic acid, separated using an Ultimate system 3000 nanoLC system (Thermo Fisher Scientific, Bremen, Germany) equipped with a 75 µm ID, 25 cm length C18 Acclaim PepMap NanoLC column (Thermo Fisher Scientific, San Jose, CA, USA) packed with 2 µm particles with a pore of 100 Å. Mobile phase A was 0.1% formic acid in water, and mobile phase B was composed of 100% acetonitrile with 0.1% formic acid. The peptides were eluted at a flow rate of 300 ng/mL with a gradient of 2% to 40% for 90 minutes. Mass spectra were acquired on a Thermo Scientific™

Orbitrap Fusion™ Lumos™ Tribrid™ Mass Spectrometer (Thermo Fisher Scientific, UK). Mass spectrometry analysis was performed in a data-dependent mode with Full-MS (externally calibrated to a mass accuracy of < 5 ppm, and a resolution of 120,000 at *m/z* 200) followed by MS/MS analysis of the most intense ions in 3 s. High-energy collision activated dissociation (HCD)-MS/MS (resolution of 15,000) was used to fragment multiply charged ions (Charge state 2-7) within a 1.4 Da isolation window at a normalized collision energy of 32. AGC target at 5e5 and 5e4 was set for MS and MS/MS analysis, respectively with previously selected ions dynamically excluded for 180 s. Max injection time was set as 50 ms. Peptides were identified with MaxQuant software version v2.0.3.1 against TrEMBL Database (*Trichomonas vaginalis* version 2022\_03) using Andromeda peptide search engine and the Table S1 was analyzed by using the Mascot searching engine (Proteome Discoverer V2.2.0.388). (TVAG revealed in-solution digestion and TV120 revealed in-gel digestion)

**Table S1.** Protein list of LC/MS/MS identification in *Spodoptera frugiperda* and TVAG database. (TOP 10 for each sample)

| Sample | Accession No.  | Protein Description                                                                                  | Score | MW [kDa] | calc. pI | Coverage [%] |
|--------|----------------|------------------------------------------------------------------------------------------------------|-------|----------|----------|--------------|
| TVAG   | XP_001580488.1 | Iron only hydrogenase large subunit, C-terminal domain containing protein [Trichomonas vaginalis G3] | 30288 | 123.9    | 6.02     | 87           |
|        | A0A0K2CTM2     | Elongation factor 1-alpha OS=Spodoptera frugiperda OX=7108 GN=SFRICE_011951 PE=2 SV=1                | 3298  | 50.3     | 9.09     | 76           |

| Sample   | Accession No.  | Protein Description                                                                                               | Score | MW [kDa] | calc. pI | Coverage [%] |
|----------|----------------|-------------------------------------------------------------------------------------------------------------------|-------|----------|----------|--------------|
|          | A0A2H1WFA2     | Heat shock 70 kDa protein cognate 4 (Fragment)<br>OS=Spodoptera frugiperda OX=7108 GN=SFRICE003522.2<br>PE=2 SV=1 | 2484  | 71.5     | 5.47     | 53           |
|          | A0A2H1W8U6     | RNA helicase OS=Spodoptera frugiperda OX=7108<br>GN=SFRICE_014296 PE=3 SV=1                                       | 1942  | 50.4     | 8.15     | 75           |
|          | A0A2H1WKT6     | SFRICE_000817 OS=Spodoptera frugiperda OX=7108<br>GN=SFRICE_000817 PE=3 SV=1                                      | 1749  | 56.7     | 9.55     | 46           |
|          | A0A2H1WX92     | SFRICE_015077 OS=Spodoptera frugiperda OX=7108<br>GN=SFRICE_015077 PE=3 SV=1                                      | 1722  | 123.1    | 6.98     | 47           |
|          | A0A0P0IVE9     | Dm0-like lamin OS=Spodoptera frugiperda OX=7108 PE=2<br>SV=1                                                      | 1598  | 70.3     | 6.68     | 58           |
|          | A0A2H1VJ24     | SFRICE_005286 OS=Spodoptera frugiperda OX=7108<br>GN=SFRICE_005286 PE=3 SV=1                                      | 1461  | 175      | 7.69     | 43           |
|          | J7ELF8         | Elongation factor 1-alpha (Fragment) OS=Spodoptera<br>frugiperda OX=7108 GN=EF1-A PE=4 SV=1                       | 1267  | 17.5     | 8.54     | 65           |
|          | A0A2H1WX17     | SFRICE016243.2 (Fragment) OS=Spodoptera frugiperda<br>OX=7108 GN=SFRICE016243.2 PE=3 SV=1                         | 1256  | 73.1     | 5.34     | 47           |
| TVAG_120 | XP_001580488.1 | Iron only hydrogenase large subunit, C-terminal domain<br>containing protein [Trichomonas vaginalis G3]           | 15708 | 123.9    | 6.02     | 82           |
|          | A0A2H1WDM1     | SFRICE_000333 OS=Spodoptera frugiperda OX=7108<br>GN=SFRICE_000333 PE=3 SV=1                                      | 977   | 137.8    | 6.09     | 37           |
|          | A0A2H1UZY8     | SFRICE_003045 OS=Spodoptera frugiperda OX=7108<br>GN=SFRICE_003045 PE=4 SV=1                                      | 599   | 89.7     | 6.79     | 28           |
|          | A0A2H1WGM5     | Kinesin-like protein OS=Spodoptera frugiperda OX=7108<br>GN=SFRICE_000564 PE=3 SV=1                               | 595   | 102.3    | 5.71     | 32           |
|          | A0A2H1VZQ4     | SFRICE_008954 OS=Spodoptera frugiperda OX=7108<br>GN=SFRICE_008954 PE=4 SV=1                                      | 564   | 129.7    | 6.71     | 21           |
|          | A0A2P1DMB4     | Argonaute 2-PEa OS=Spodoptera frugiperda OX=7108 PE=2<br>SV=1                                                     | 559   | 122.8    | 9.19     | 24           |
|          | A0A2H1WMH3     | SFRICE_015519 OS=Spodoptera frugiperda OX=7108<br>GN=SFRICE_015519 PE=4 SV=1                                      | 558   | 85.9     | 8        | 28           |



| Sample     | Accession No.                                                                           | Protein Description | Score | MW [kDa] | calc. pI | Coverage [%] |
|------------|-----------------------------------------------------------------------------------------|---------------------|-------|----------|----------|--------------|
| A0A2H1WDQ7 | SFRICE_022593 (Fragment) OS=Spodoptera frugiperda<br>OX=7108 GN=SFRICE_022593 PE=4 SV=1 |                     | 478   | 70.8     | 5.54     | 38           |
| A0A2H1WKD0 | SFRICE_013904 (Fragment) OS=Spodoptera frugiperda<br>OX=7108 GN=SFRICE_013904 PE=4 SV=1 |                     | 438   | 138      | 6.74     | 18           |
| A0A2H1VJE7 | Ribonuclease Z OS=Spodoptera frugiperda OX=7108<br>GN=SFRICE_017182 PE=3 SV=1           |                     | 415   | 111.6    | 7.81     | 23           |

Criteria: Master protein and score  $\geq 25$

(TVAG revealed in-solution digestion and TV120 revealed in-gel digestion)

**Table S2.** NOS Cofactors binding sites, sequences and TV1 Mass Spectrometry protein

sequences including NCBI BLASTp results (including identity and positives)

| Cofactors binding | Cofactors binding sequences             | identity         | positives        | Mass Spectrometry protein sequence                 | identity | positives |
|-------------------|-----------------------------------------|------------------|------------------|----------------------------------------------------|----------|-----------|
| zinc              | CSTKLVN                                 | Multiple species | Multiple species | TAGNNYTLACSTKLVNNME<br>ITTNTPDVK                   | 100      | 100       |
| heme binding site | LCVNCGRVCVRACS<br>DIQCIGA               | 100              | 100              | AEKTHALSFDPSLCVNCGR                                | 100      | 100       |
| BH4               | PGGCFYGGGQPK<br>MSRKTAIEIQE             | 100              | 100              | AAVCNSIADARDFIESGKFH<br>EYDYIEVLACPGGCFYGGG<br>QPK | 100      | 100       |
| calmodulin        | NKLFSASVGDSNN<br>NLL                    | 100              | 100              | LFSASVGDSNNNLLHTTFSK                               | 100      | 100       |
| FMN               | ICALGSKDYQKYC<br>FCGHQLDKLFVQ<br>HKSRLI | 100              | 100              | YCFCGHQLDKLFVQHK                                   | 100      | 100       |
| FAD pyrophosphate | YQTGDLVGILPEN                           | 100              | 100              | YQIKLPPGVIIYQTGDLVGILP<br>ENEDAVK                  | 100      | 100       |

|                     |                        |                         |                         |                              |     |     |
|---------------------|------------------------|-------------------------|-------------------------|------------------------------|-----|-----|
| FAD<br>isoaaloazine | IWPRLYCIASA            | 100                     | 100                     | LYCIASAPTNSSVIDLIISDR        | 100 | 100 |
| NADPH<br>ribose     | IMVAIGCGIAPMM<br>S     | 100                     | 100                     | NVDTPIMVAIGCGIAPMMS<br>MLQHR | 100 | 100 |
| NADPH<br>adenine    | PNCVIMYCGPPIG<br>VPDQI | 100                     | 100                     | DPNCVIMYCGPPIGVPDQIK         | 100 | 100 |
| NADPH               | HPHLFESF               | Multip<br>le<br>species | Multip<br>le<br>species | none                         | NA  | NA  |

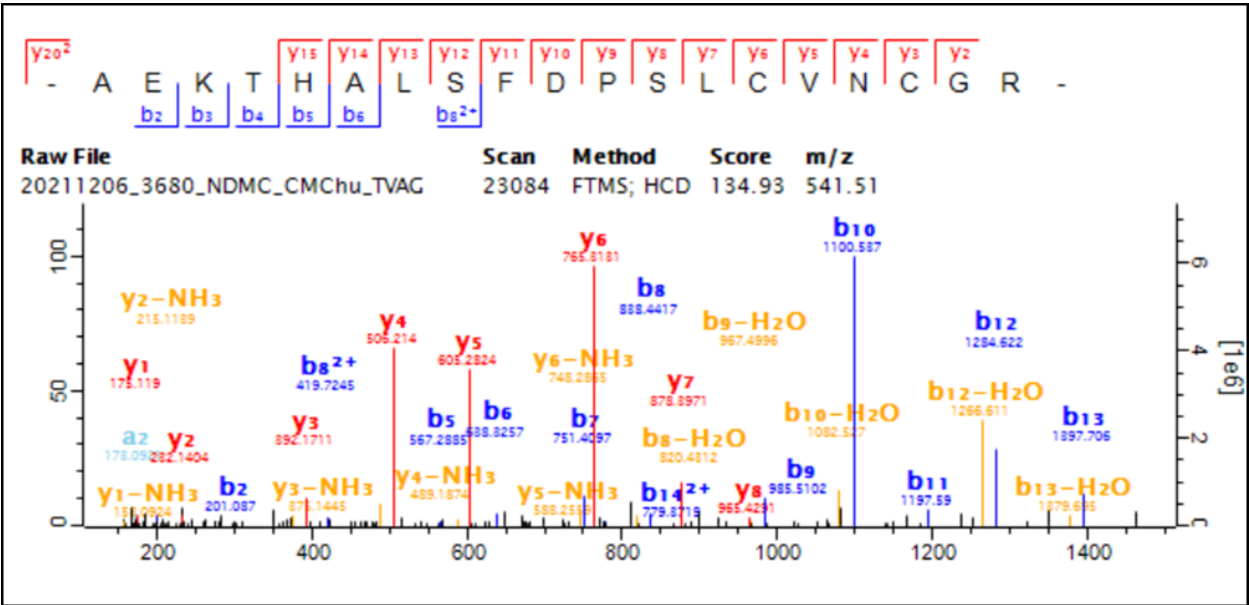

Figure S12. Mass Spectrometry protein sequence of heme binding site

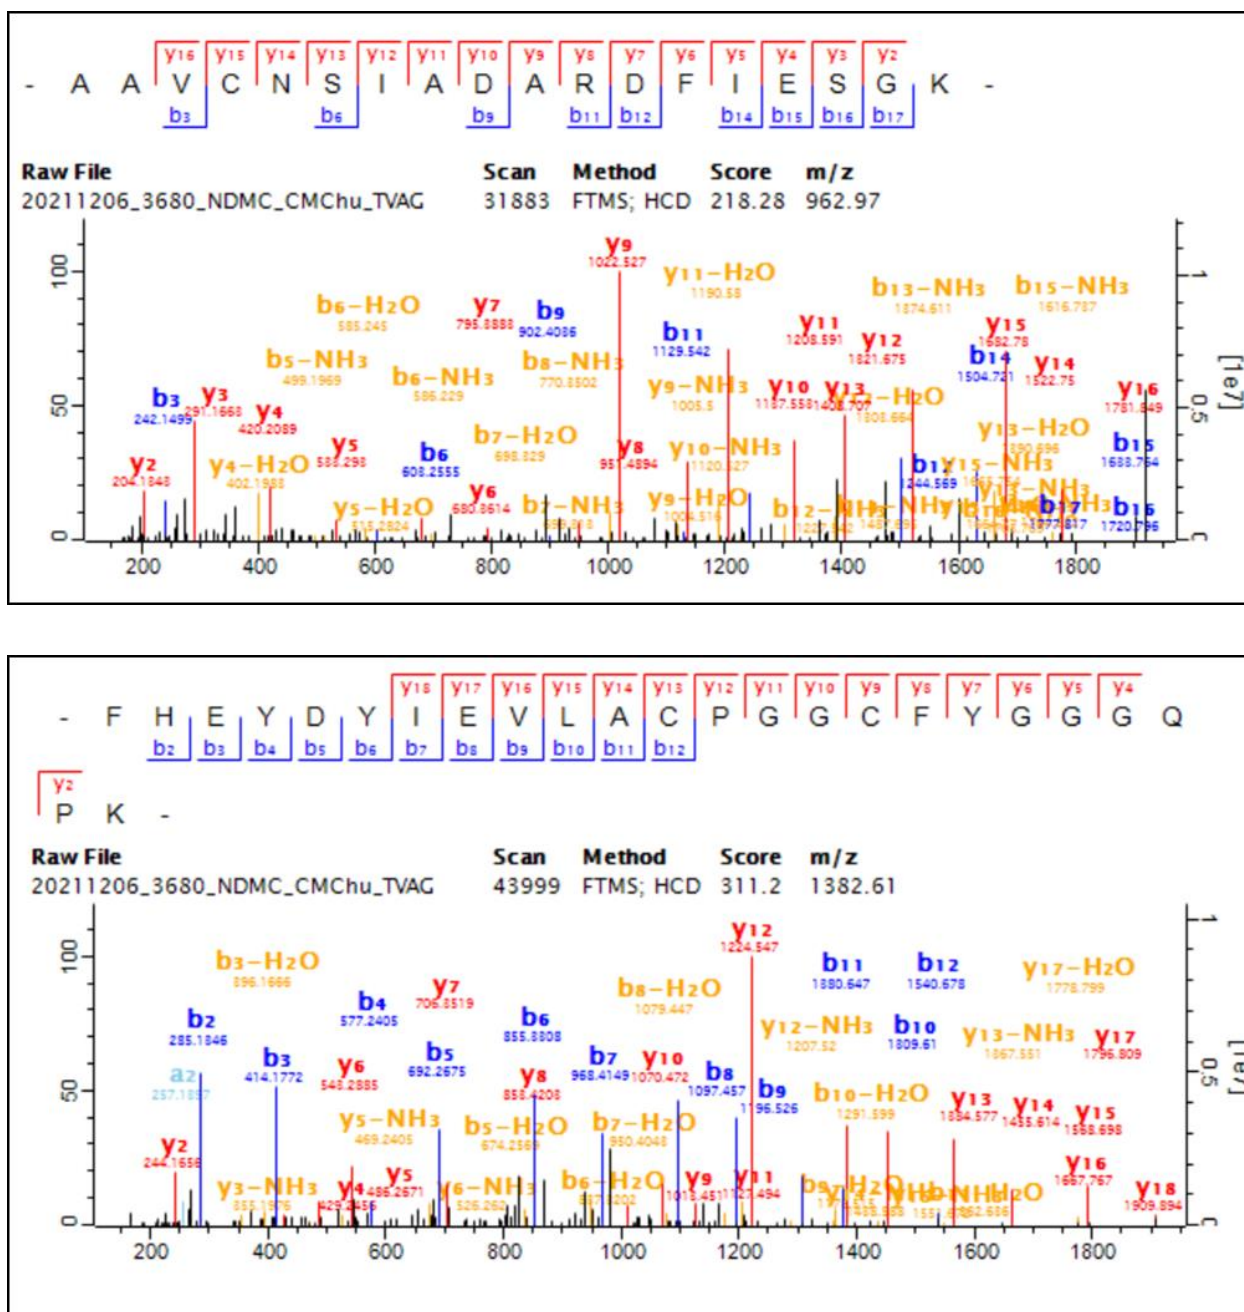

Figure S13. Mass Spectrometry protein sequence of BH4 binding site

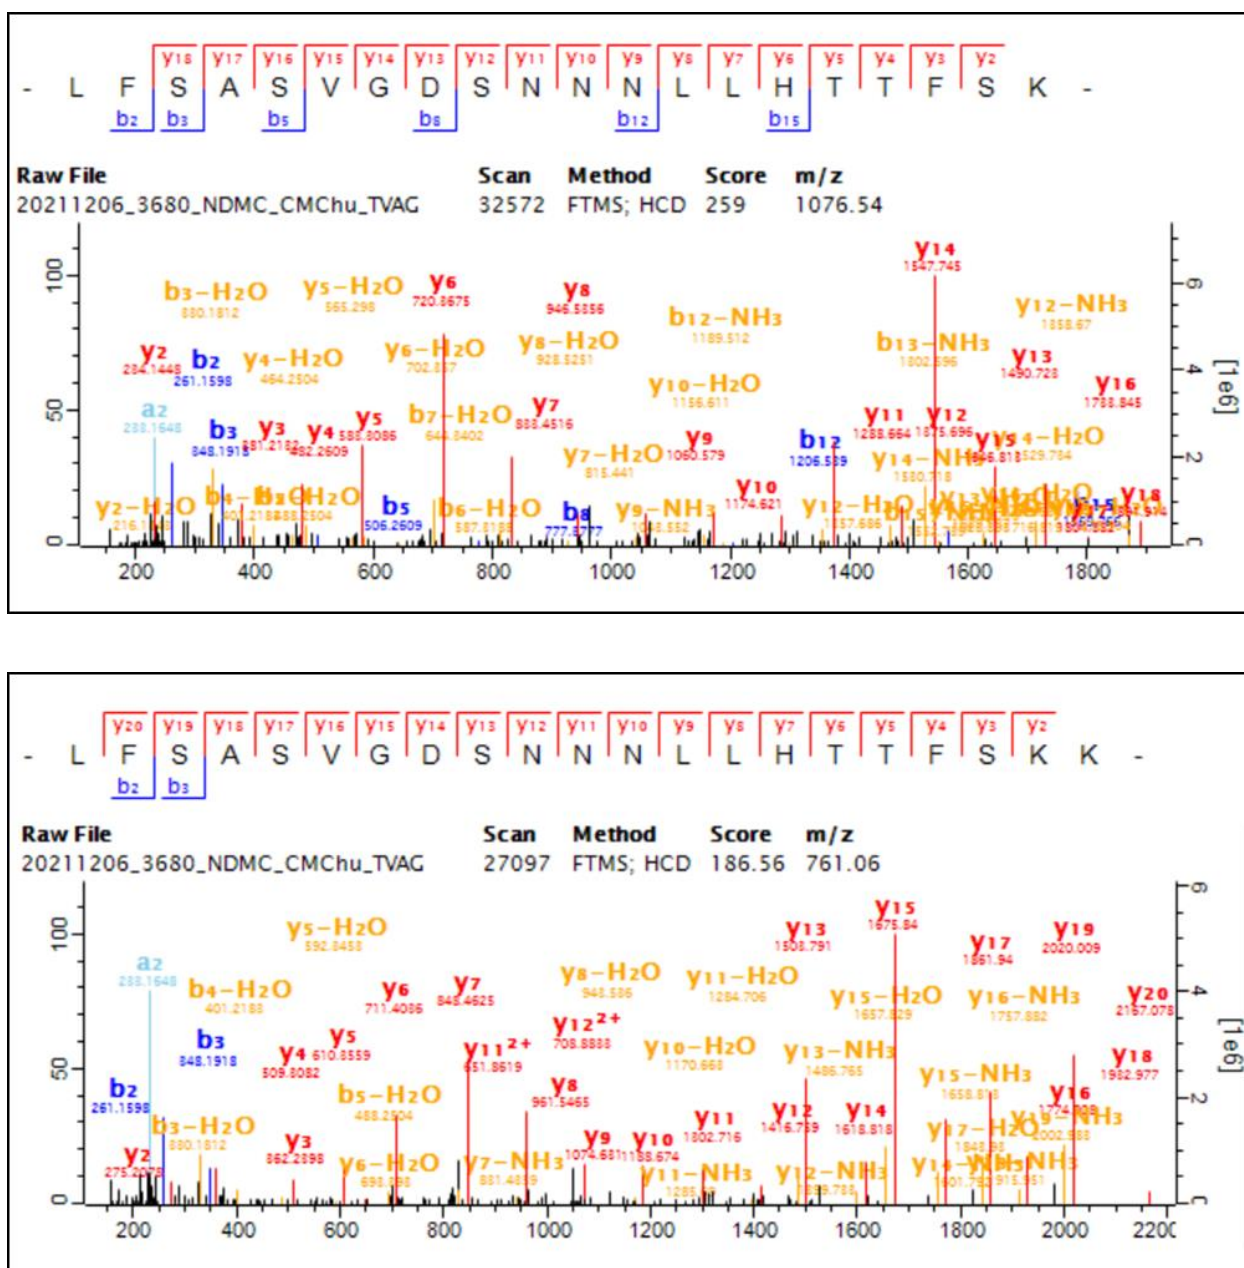

**Figure S14.** Mass Spectrometry protein sequence of calmodulin binding site

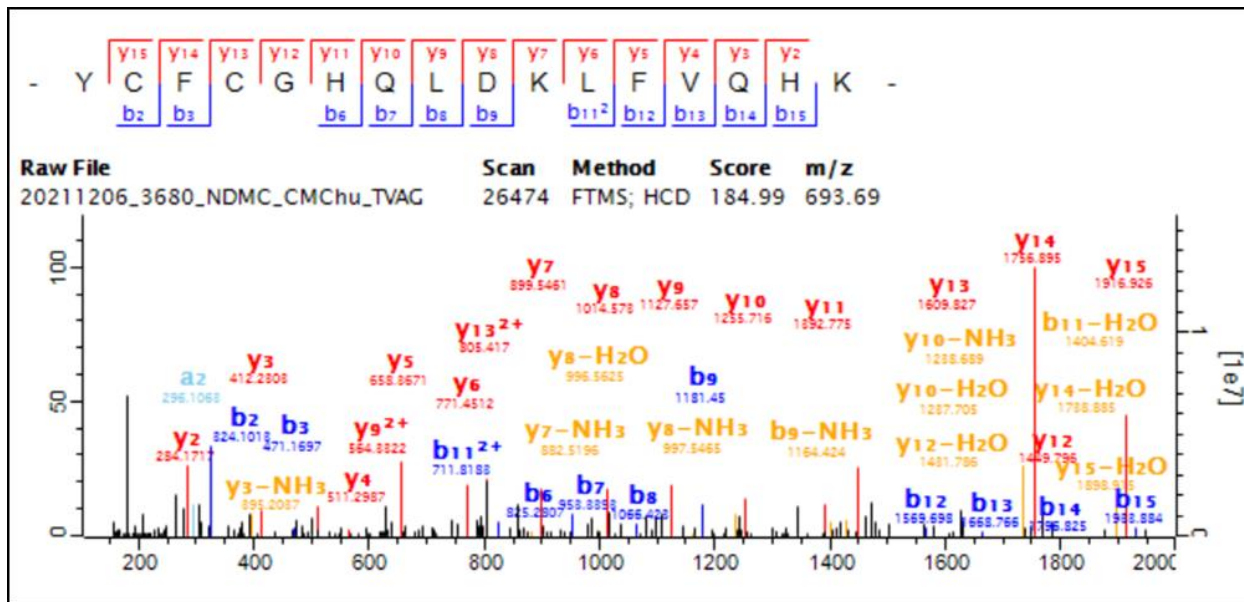

**Figure S15.** Mass Spectrometry protein sequence of FMN binding site

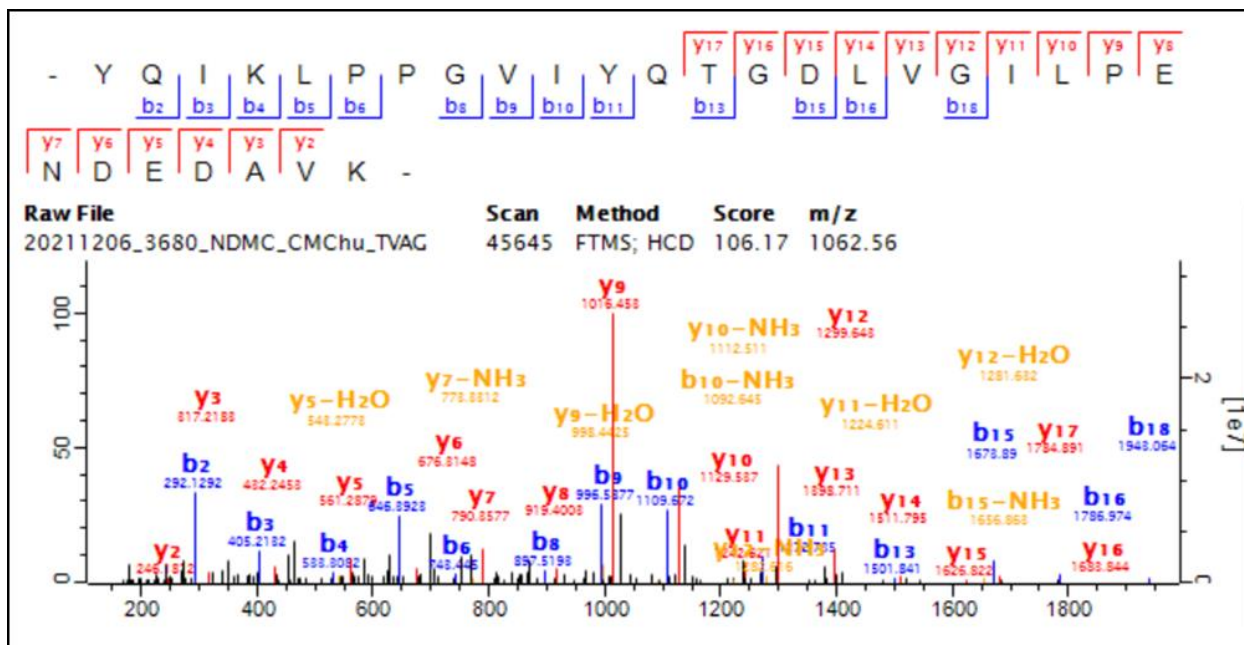

**Figure S16.** Mass Spectrometry protein sequence of FAD pyrophosphate binding site



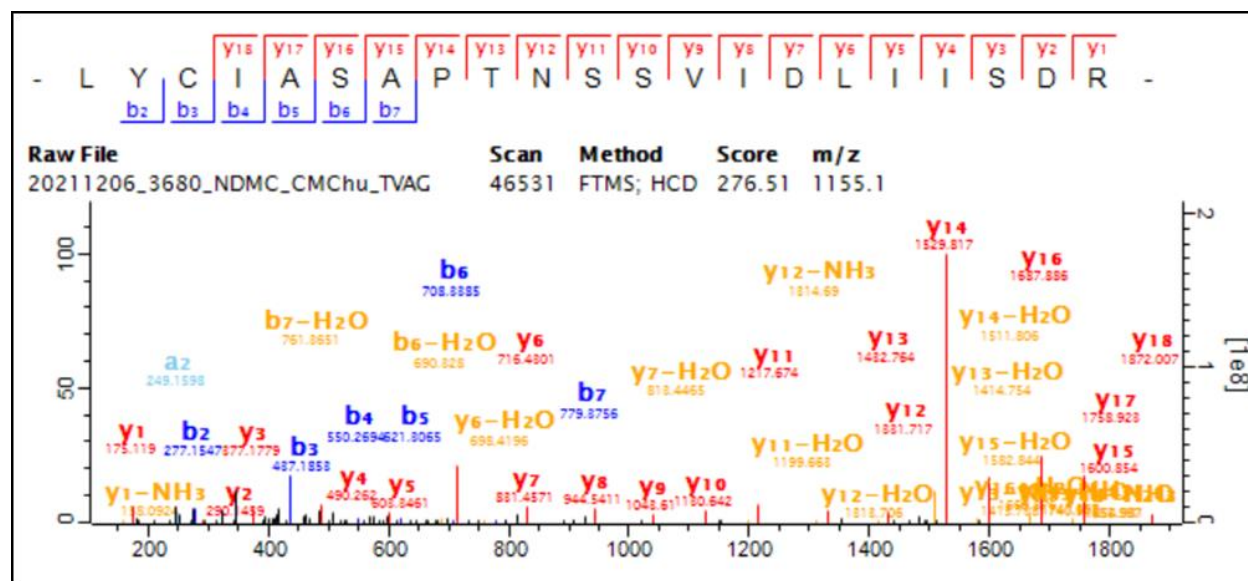

**Figure S17.** Mass Spectrometry protein sequence of FAD isoaaloxazine binding site

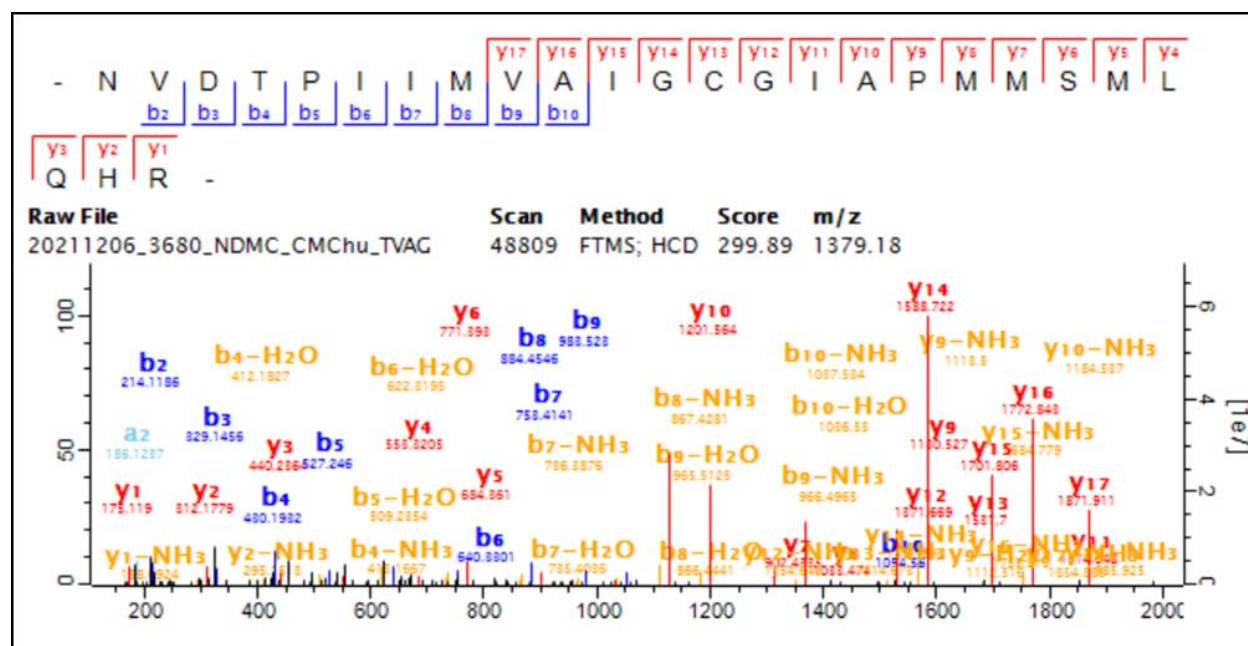

**Figure S18.** Mass Spectrometry protein sequence of NADPH ribose binding site

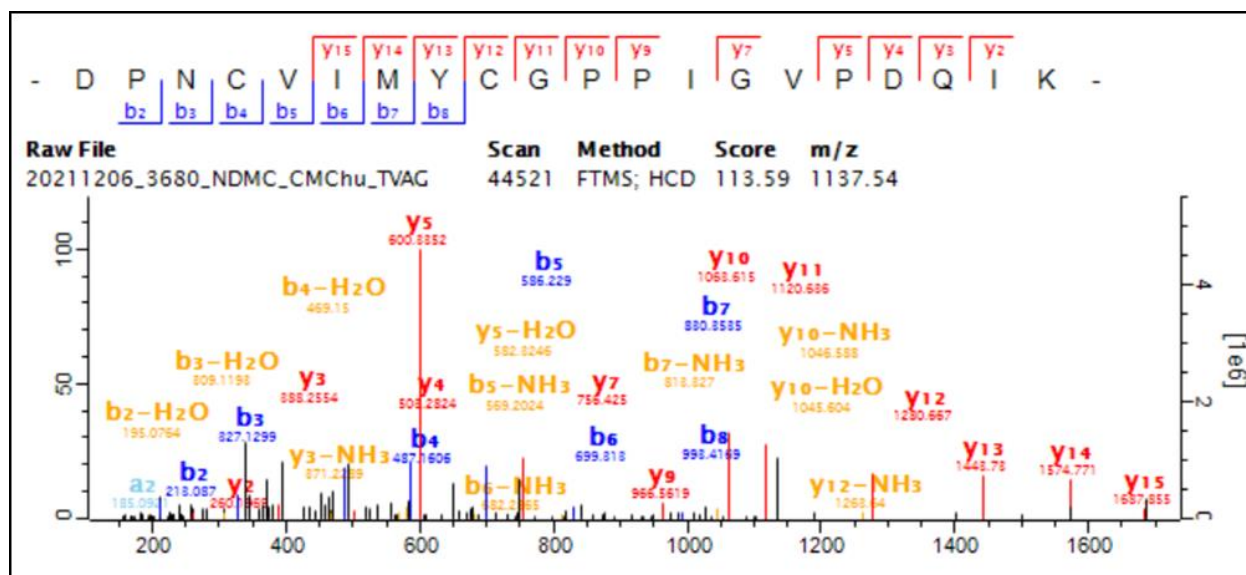

**Figure S19.** Mass Spectrometry protein sequence of NADPH adenine binding site

## Internal validation and External validation method of our hybrid gene annotation method

### *Internal validation*

For protein sequence X of *T. vaginalis* (with annotated function X), we assumed that *T. vaginalis* did not have function X and used Smith-Waterman alignment to compare the whole protein sequence of *T. vaginalis* with protein sequence X to verify that our bioinformatics comparison method can correctly predict function X in *T. vaginalis*. The X proteins were experimentally validated on the UniProt website, and four proteins were selected as targets for this study, with the following exclusion criteria:

1. Probable and putative protein names: these reduce the uncertainty of the validation results.
2. The number of FASTA data in the NCBI search is too small (only 2 sets of data): it does not adequately represent the cross-species protein assumed in this study.
3. Too many data items (>10,000 set of data): The comparison time is more than one month.
4. An amino acid length of less than 100: The scores below the score set in this study are included in the standard of 100 points [6,7].

### ***External validation***

For a whole protein sequence of species Y (with annotation NOS), we assumed that no NOS was found in species Y and used Smith-Waterman alignment to compare NOS sequences in other species with the sequences of species Y to verify that our bioinformatics comparison method can correctly identify NOS sequences in other species [6,7].



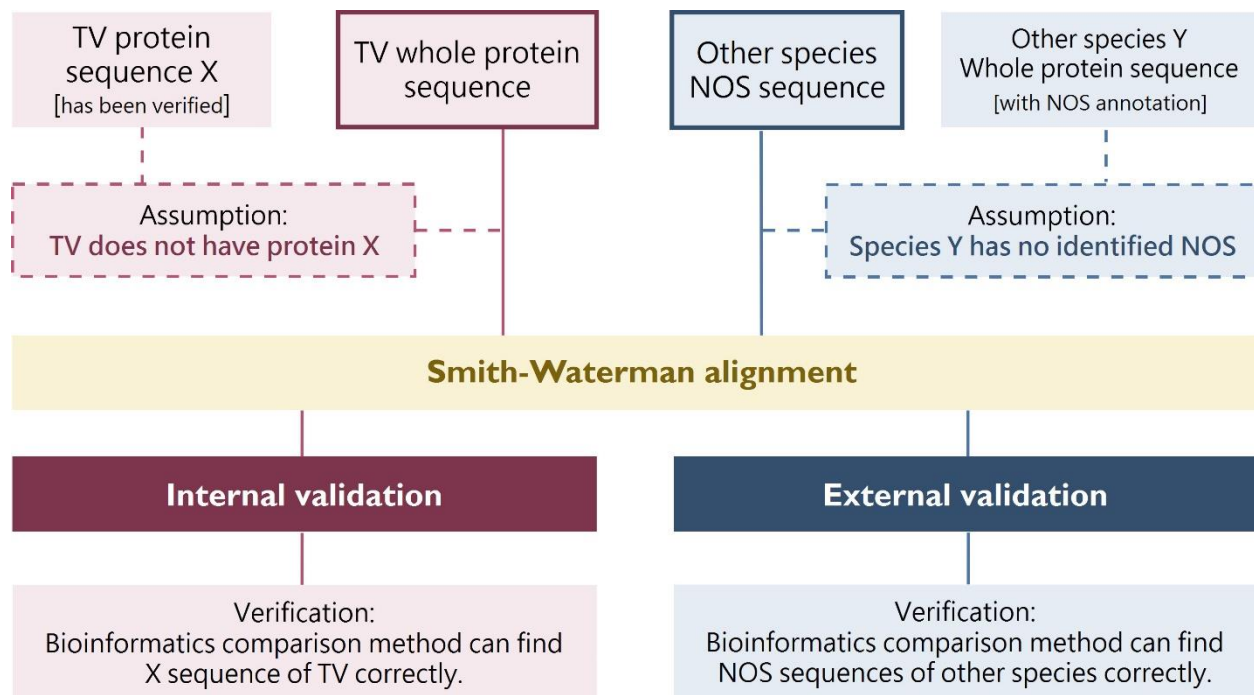

**Figure S20.** Internal validation and External validation of this bioinformatic method in our laboratory [7]

**Table S3. The summary of the ratio of i/j and i/30 in the annotation process in our laboratory**

| Species               | Protein          | i          | j        | i/j           | i/30         | i> i     | i/j>i/30 | i>j and i/j>i/30 | Remark                |
|-----------------------|------------------|------------|----------|---------------|--------------|----------|----------|------------------|-----------------------|
| Trichomonas Vaginalis | GTF              | 1436       | 15       | 95.733        | 53.185       | Y        | Y        | Y                | internal validation   |
| Trichomonas Vaginalis | GLK1             | 180        | 16       | 11.250        | 6.000        | Y        | Y        | Y                | internal validation   |
| Trichomonas Vaginalis | PFP              | 3991       | 28       | 142.536       | 133.033      | Y        | Y        | Y                | internal validation   |
| Trichomonas Vaginalis | SCL              | 1038       | 28       | 37.071        | 34.600       | Y        | Y        | Y                | internal validation   |
| Trichomonas Vaginalis | Carbamate kinase | 10249      | 10       | 1024.900      | 341.633      | Y        | Y        | Y                | internal validation   |
| Trichomonas Vaginalis | NOS              | <b>273</b> | <b>6</b> | <b>45.500</b> | <b>9.100</b> | <b>Y</b> | <b>Y</b> | <b>Y</b>         | <b>TV NOS protein</b> |
| Trichomonas Vaginalis | insulin          | 8          | 102      | 0.078         | 0.267        | N        | N        | N                | Negative Verification |
| Trichomonas Vaginalis | heme oxygenase   | 119        | 33       | 3.606         | 3.967        | Y        | N        | N                | Negative Verification |
| Trichomonas Vaginalis | Aquaporin        | 3          | 28       | 0.107         | 0.100        | N        | Y        | N                | Negative Verification |
| Physarum polucephalum | NOS              | 5517       | 8        | 689.625       | 183.900      | Y        | Y        | Y                | External validation   |

GTF: Dolichyl-phosphate beta-glucosyltransferase; GLK1: Glucokinase 1; PFP: Pyrophosphate--fructose 6-phosphate 1-phosphotransferase; SCL: Succinate--CoA ligase

(1)  $i$  stands of the non-TV NOS protein sequences for searching candidate proteins.

(2)  $j$  stands for all TV protein sequences recognized as candidates.

After years of research in our laboratory, the rule-of-thumb of our annotation method has been formulated. We infer that the candidate sequence standard can be set by the  $i/j$  ratio (witness-to-suspect ratio). When  $i > j$  and  $i/j > i/30$ , the verification result can be established. For example, we use the human insulin sequence with TV full sequence alignment was used as a negative verification. The  $i/j$  is not greater than  $i/30$  of human insulin to TV full sequences, so it can be inferred that *Trichomonas vaginalis* has no insulin protein.[1]

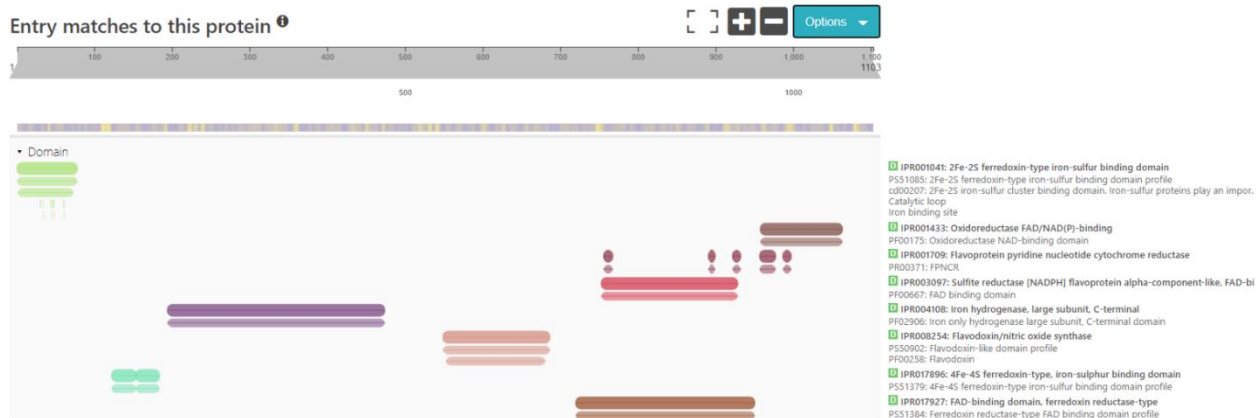

- D IPR001041: 2Fe-2S ferredoxin-type iron-sulfur binding domain**  
PS51085: 2Fe-2S ferredoxin-type iron-sulfur binding domain profile  
cd00207: 2Fe-2S iron-sulfur cluster binding domain. Iron-sulfur proteins play an impor.  
Catalytic loop  
Iron binding site
- D IPR001433: Oxidoreductase FAD/NAD(P)-binding**  
PF00175: Oxidoreductase NAD-binding domain
- D IPR001709: Flavoprotein pyridine nucleotide cytochrome reductase**  
PR00371: FPNCR
- D IPR003097: Sulfite reductase [NADPH] flavoprotein alpha-component-like, FAD-bi**  
PF00667: FAD binding domain
- D IPR004108: Iron hydrogenase, large subunit, C-terminal**  
PF02906: Iron only hydrogenase large subunit, C-terminal domain
- D IPR008254: Flavodoxin/nitric oxide synthase**  
PS50902: Flavodoxin-like domain profile  
PF00258: Flavodoxin
- D IPR017896: 4Fe-4S ferredoxin-type, iron-sulphur binding domain**  
PS51379: 4Fe-4S ferredoxin-type iron-sulfur binding domain profile
- D IPR017927: FAD-binding domain, ferredoxin reductase-type**  
PS51384: Ferredoxin reductase-type FAD binding domain profile

**Figure S21.** The result of protein sequences of TV NOS submitted to INTERPRO website. Domain predictions were showed.

## References

1. Shevchenko, A.; Wilm, M.; Vorm, O.; Mann, M. Mass spectrometric sequencing of proteins silver-stained polyacrylamide gels. *Anal. Chem.* **1996**, *68*, 850–858; DOI:10.1021/ac950914h.
2. Gharahdaghi, F.; Weinberg, C.R.; Meagher, D.A.; Imai, B.S.; Mische, S.M. Mass spectrometric identification of proteins from silver-stained polyacrylamide gel: a method for the removal of silver ions to enhance sensitivity. *Electrophoresis* **1999**, *20*, 601–605; DOI:10.1002/(sici)1522-2683(19990301)20:3<601::aid-elps601>3.0.co;2-6.
3. Madda, R.; Chen, C.M.; Wang, J.Y.; Chen, C.F.; Chao, K.Y.; Yang, Y.M.; Wu, H.Y.; Chen, W.M.; Wu, P.K. Proteomic profiling and identification of significant markers from high-grade osteosarcoma after cryotherapy and irradiation. *Sci. Rep.* **2020**, *10*, 2105; DOI:10.1038/s41598-019-56024-7.
4. Chiang, C.H.; Wu, C.C.; Lee, L.Y.; Li, Y.C.; Liu, H.P.; Hsu, C.W.; Lu, Y.C.; Chang, J.T.; Cheng, A.J. Proteomics analysis reveals involvement of Krt17 in areca nut-induced oral carcinogenesis. *J. Proteome Res.* **2016**, *15*, 2981–2997; DOI:10.1021/acs.jproteome.6b00138.
5. Ke, C.H.; Wang, Y.S.; Chiang, H.C.; Wu, H.Y.; Liu, W.J.; Huang, C.C.; Huang, Y.C.; Lin, C.S. Xenograft cancer vaccines prepared from immunodeficient mice

- increase tumor antigen diversity and host T cell efficiency against colorectal cancers. *Cancer Lett.* **2022**, 526, 66–75; DOI:10.1016/j.canlet.2021.11.012.
6. Liu, H.L.; Chu, C.M. Genome Annotation for Nitric Oxide Synthase of *Trichomonas vaginalis* by Smith-Waterman Algorithm based on the NCBI Protein Database. M.Sc. Thesis, National Defense Medical Center, Taipei, Taiwan, 2012.
  7. Yang, Y.T.; Chu, C.M. Using Smith-Waterman Alignment to Annotate Nitric Oxide Synthase in *Trichomonas vaginalis*. M.Sc. Thesis, National Defense Medical Center, Taipei, Taiwan, 2017.
